# Supplementary material for: Sulfobutylation of Beta-Cyclodextrin Enhances the Complex Formation with Mitragynine: An NMR and Chiroptical Study
Source: MDPI journal article supplement (doi:10.3390/ijms23073844), 2022-03-31
Supplement: s1 [file s1]

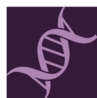

*Supplementary Material*

# Cyclodextrin charge modulates the complex formation with mitragynine: an NMR and chiroptical study

Bianka Várnai<sup>1</sup>, Ferenc Zsila<sup>2</sup>, Zoltán Szakács<sup>3</sup>, Zsófia Garádi<sup>1</sup>, Milo Malanga<sup>4</sup>, Szabolcs Béni<sup>1,\*</sup>

<sup>1</sup> Semmelweis University, Department of Pharmacognosy, Üllői út. 26, H-1085 Budapest, Hungary; bnkvarnai@gmail.com (B.V.) garadi.zsofia@pharma.semmelweis-univ.hu (Z.G.)  
beni.szabolcs@pharma.semmelweis-univ.hu (S.B)

<sup>2</sup> Institute of Materials and Environmental Chemistry, Research Centre for Natural Sciences, Budapest, Hungary; zsila.ferenc@ttk.hu (F.Z.)

<sup>3</sup> Gedeon Richter Plc., Spectroscopic Research Department, H-1475 Budapest, P.O.B. 27, Hungary; z.szakacs@richter.hu (Z.S.)

<sup>4</sup> CycloLab (last affiliation), Cyclodextrin R&D Ltd, Budapest, H-1097 Illatos út 7, Hungary; malanga@cyclolab.com (M.M.)

\* Correspondence: beniszabi@gmail.com or beni.szabolcs@pharma.semmelweis-univ.hu Tel.: +36 1 317 2979

## Supplementary Materials

**Table S1.** Complete  $^1\text{H}$  and  $^{13}\text{C}$  NMR resonance assignment for mitragynine in ppm ( $\text{D}_2\text{O}$  at pH 4.5, 600 MHz).

| No. | $^1\text{H}$                | $^{13}\text{C}$ |
|-----|-----------------------------|-----------------|
| 1   | 6.61 (d, $J = 7.8$ Hz, 1H)  | 100.5           |
| 2   | 7.11 (d, $J = 7.8$ Hz, 1H)  | 123.6           |
| 3   | 7.01 (d, $J = 8.2$ Hz, 1H)  | 105.2           |
| 4   | -                           | 137.9           |
| 5   | -                           | 115.7           |
| 6   | -                           | 153.6           |
| 7   | -                           | 127.0           |
| 8   | -                           | 104.7           |
| 9   | 3.16 (m, 1H)                | 20.2            |
| 9'  | 3.30 (m, 1H)                |                 |
| 10  | 3.32 (m, 1H)                |                 |
| 10' | 3.66 (m, 1H)                |                 |
| 11  | 4.11 (d, $J = 7.8$ Hz, 1H)  | 62.6            |
| 12  | 2.25 (m, 1H)                | 26.6            |
| 12' | 2.59 (q, $J = 10.9$ Hz, 1H) |                 |
| 13  | 3.16 (m, 1H)                | 36.7            |
| 14  | 1.96 (m, 1H)                | 38.2            |
| 15  | 3.22 (m, 1H)                | 55.7            |
| 15' | 3.59 (d, $J = 13.0$ Hz, 1H) |                 |
| 16  | 1.40 (m, 2H)                | 17.8            |
| 16' |                             |                 |
| 17  | 0.80 (t, $J = 7.4$ Hz, 3H). | 11.2            |
| 18  | -                           | 107.7           |
| 19  | -                           | 171.0           |
| 20  | 3.63 (s, 3H)                | 51.7            |
| 21  | 7.58 (s, 1H)                | 163.4           |
| 22  | 3.77 (s, 3H)                | 61.8            |
| 23  | 3.84 (s, 3H)                | 55.3            |

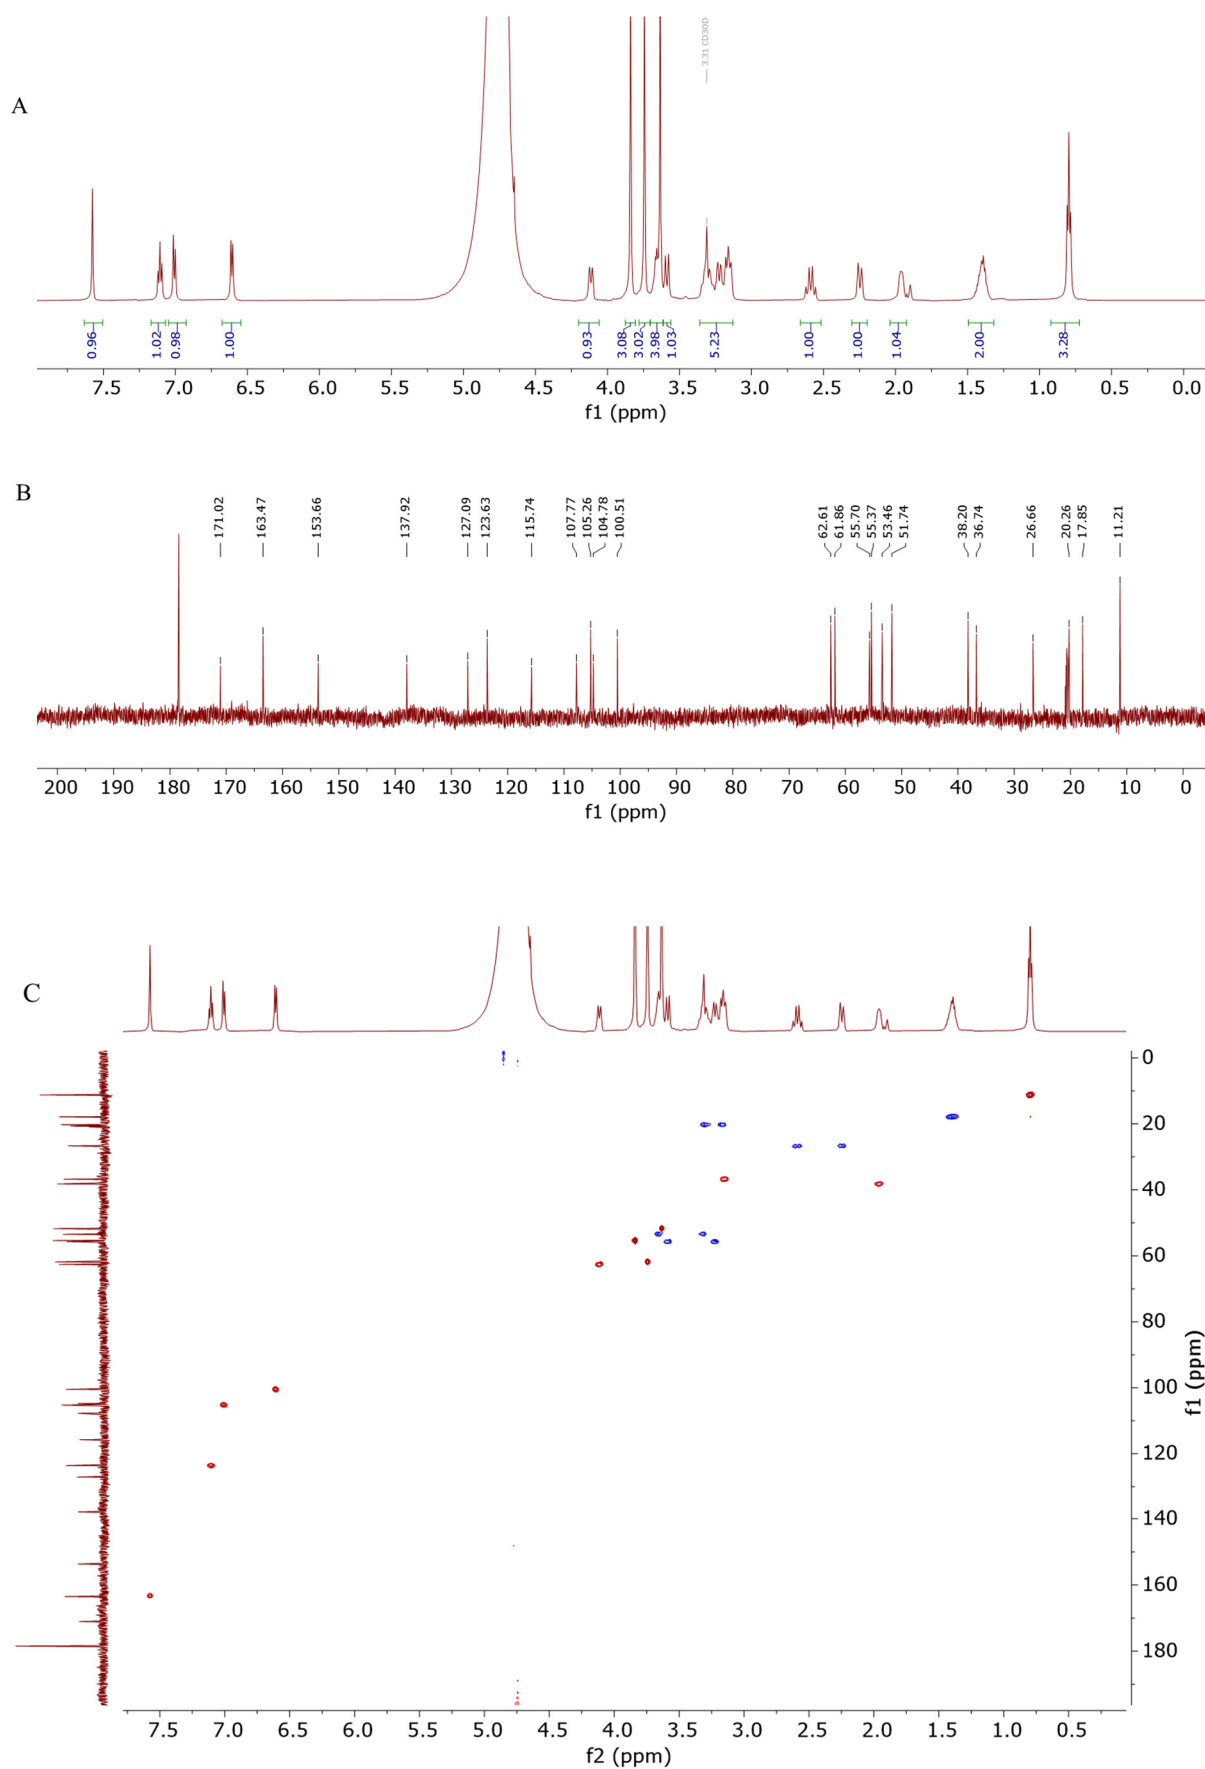

**Figure S1.**  $^1\text{H}$  (A),  $^{13}\text{C}$  (B) and HSQC (C) NMR spectra of mitragynine.

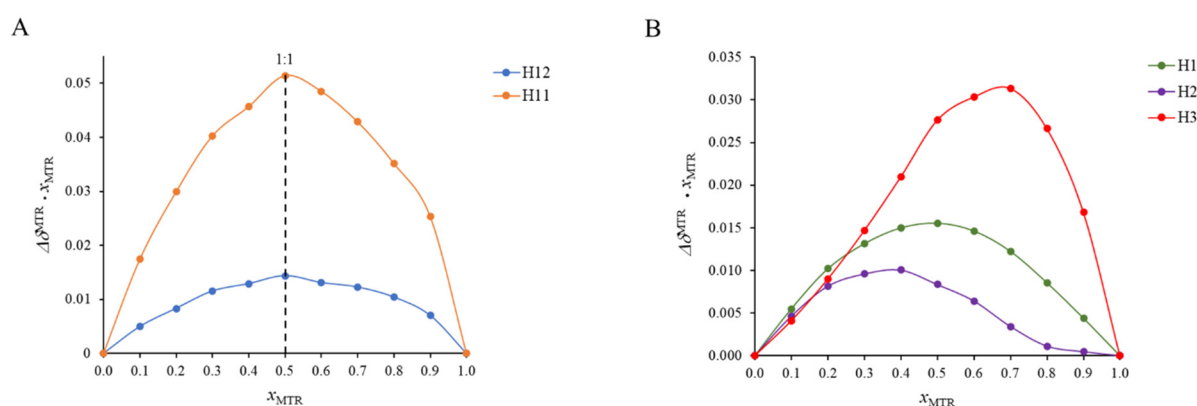

**Figure S2.** Job's plot for the selected  $^1\text{H}$  resonances of MTR in the case of NMR titration with  $\beta\text{CyD}$  (A) and with SBE $\beta\text{CyD}$  (B)

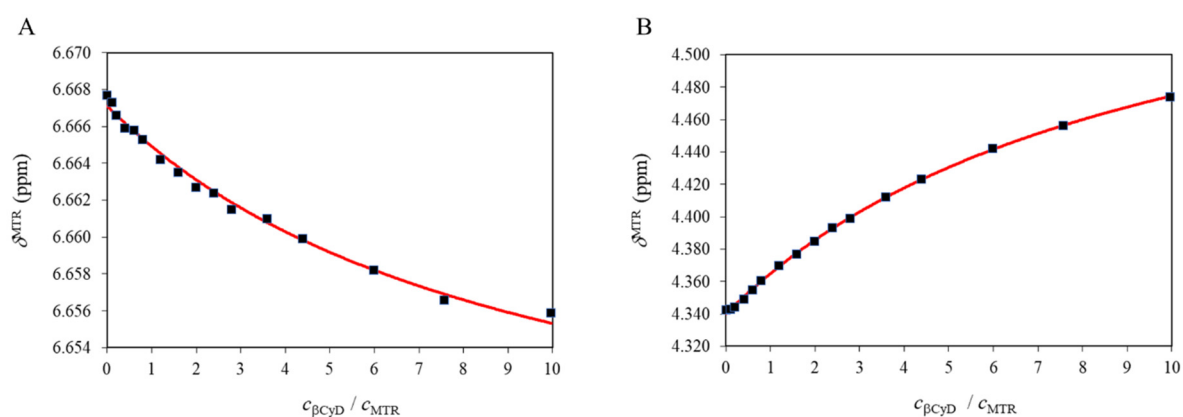

**Figure S3.** Chemical shift profile of the H1 (A) and H10 (B) resonances of MTR upon titration with  $\beta\text{CyD}$ , fitted by the 1:1 complexation model using OPIUM program (red curves).

**Table S2.**  $^1\text{H}$  NMR chemical shifts (in ppm) of the uncomplexed and complexes species along with the stability constants of the 1:1 and 2:1 complexes (MTR titration with SBE $\beta\text{CyD}$ ) computed by simultaneous fitting of all titration profiles with the OPIUM program (uncertainties in parenthesis are estimated standard deviations for the last significant digit)

| Nucleus | $\delta_{\text{MTR}}$ | $\delta_{\text{MTR-CyD}}$ | $\delta_{2\text{MTR-CyD}}$ |
|---------|-----------------------|---------------------------|----------------------------|
| H1      | 6.6678 (12)           | 6.6203 (8)                | 6.5319 (103)               |
| H2      | 7.1695 (12)           | 7.2312 (9)                | 7.1325 (56)                |
| H3      | 7.0744 (12)           | 7.1423 (8)                | 7.0795 (35)                |
| H11     | 4.3549 (13)           | 4.6067 (17)               | 4.0321 (328)               |
| H12     | 2.3595 (12)           | 2.4563 (9)                | 2.3005 (80)                |
| H17     | 0.8663 (12)           | 0.9225 (8)                | 0.8432 (46)                |
